Full-Title: **Spatio-Temporal Dynamics of Landscape Use by the Bumblebee *Bombus atratus***  
**(Hymenoptera: Apidae) and its relationship with pollen provisioning.**

Short-Title: **Spatio-temporal use of the environment and floral resources.**

**Pablo Cavigliasso<sup>1\*</sup>, Colin C. Phifer<sup>2</sup>; Erika M. Adams<sup>2</sup>; David Flaspohler<sup>2</sup>, Gerardo P. Gennari<sup>3</sup>;**  
**Julian A. Licata<sup>1</sup>, Natacha P. Chacoff<sup>4,5</sup>**

*1- Instituto Nacional de Tecnología Agropecuaria, Concordia, Entre Ríos (Argentina). Programa*  
*Nacional Apícola.*

*2-School of Forest Resources and Environmental Science, Michigan Technological University.*  
*Houghton, Michigan (United States of America)*

*3- Instituto Nacional de Tecnología Agropecuaria. Famaillá, Tucumán (Argentina). Programa*  
*Nacional Apícola.*

*4- Instituto de Ecología Regional, CONICET-Universidad Nacional de Tucumán, Tucumán*  
*(Argentina).*

*5- Facultad de Ciencias Naturales e Instituto Miguel Lillo, Universidad Nacional de Tucumán,*  
*Tucumán (Argentina)*

\* Corresponding author

E-mail: [cavigliasso.pablo@inta.gob.ar](mailto:cavigliasso.pablo@inta.gob.ar)

## Abstract.

Understanding how bees use resources at a landscape scale is essential for developing meaningful management plans that sustain populations and the pollination services they provide. Bumblebees are important pollinators for many wild and cultivated plants, and have experienced steep population declines worldwide. Bee foraging behavior can be influenced by resource availability and the bee's lifecycle stage. To better understand these relationships, we studied the habitat selection of *Bombus atratus* by tracking 17 queen bumblebees with radio telemetry in blueberry fields in Entre Ríos province, Argentina. To evaluate land use and floral resources used by bumblebees, we tracked bees before and after nest establishment and estimated home ranges using minimum convex polygons and kernel density methods. We also classify the pollen of their body to determine which botanical resources they use from the floral species available. We characterized land use for each bee as the relative proportion of GPS points inside of each land use. Bumblebees differed markedly in their movement behavior in relation to nest establishment. They moved over larger areas and mostly within blueberry fields before to nest establishment, in contrast to after establishing the nest that they preferred the edges near forest plantations and changed the nutritional resources by wild floral species. Our study is the first to track queen bumblebee movements in an agricultural setting and relate movement change across time and space with pollen resource availability. This study provides insight into the way bumblebee queens use different habitat elements at crucial periods in their lifecycle, showing the importance of mass flowering crops like blueberry in the first stages of queen's lifecycle and how diversified landscapes help support bee populations as their needs changes during different phases of their lifecycle.

**Keywords: Blueberries; bumblebee; ecosystem services; home range; habitat selection; pollination.**

## 47 **Introduction.**

48       Animal assisted pollination is crucial for the reproduction of wild and domesticated plants, and  
 49 worldwide, insects are the main provider of this service [1]. Insect pollinators help to maintain trophic  
 50 networks in nature [2] and help improve both quality and quantity of crops for human consumption [3-5].  
 51 Approximately 35% of global food production, and approximately 70% of economically important crop  
 52 species depend upon insect pollination (to different degrees) [6-7]. Bees are one of the most important  
 53 insect pollinators, but both wild and managed bee populations are declining [8-12], decreasing their  
 54 potential pollination service [13-15]. Land use intensification and fragmentation associated with  
 55 agriculture have contributed to bee population declines [16-17]. Understanding how bees use the resources  
 56 in agricultural landscapes is essential to develop meaningful farm-based land use management plans that  
 57 sustain bee populations and maximize the potential pollination service they provide to farmers and  
 58 ecosystems [18-20].

59       In these agricultural landscapes, bumblebees (*Bombus spp.*) are one of the most important groups of  
 60 bee pollinators [21]. Even so, among insect pollinators, bumblebees have experienced some of the steepest  
 61 population declines and range contractions [22-25]. *Bombus spp.* have a large foraging capacity and can  
 62 fly in a wider range of ambient temperatures than many other bee species [26-27], present the  
 63 characteristic “buzz-pollination” causes large amount of pollen to be released, making them efficient  
 64 pollinators for a variety of crops (eg. blueberry) [28-33]. They have eusocial habits [34] with colonies that  
 65 can reach up to 400 individuals with several queens [35]. These have an annual lifecycle and, unlike  
 66 honeybees, they do not store large quantities of honey or pollen in their nest [36]. As such, the survival of  
 67 the colony depends upon the availability of suitable food for the different stages of its life cycle within  
 68 foraging distance of the nest, since their nutritional requirements differ pre- and post- establishment.  
 69 Environmental or habitat changes can negatively impact a colony’s success and chance of survival [37].

The forces that shape individual bumblebee flower or patch choice remain poorly understood [38], but previous work suggests that *Bombus spp.* are guided by visual, olfactory and social cues as well as the quality and quantity of floral resources [37]. This last factor resources are subject to temporal and spatial changes, presenting marked differences with respect to the stage of the cycle where they are found and translating into changes in their availability within the landscape [34]. Historically, it has been difficult to track individual bee movements [39] but today, newer technologies have enabled biologists to use miniaturized radio telemetry transmitters on bees [40-41].

We studied habitat selection of one bumblebee species, *B. atratus*, using radio telemetry in an agroecosystem dominated by blueberries in the state of Entre Ríos, Argentina. Our objective was to determine how the queens of *B. atratus* modify their spatio-temporal use of the blueberry agroecosystem [42], and to provide new knowledge about how they change their flight behavior and landscape use during different lifecycle stages. We hypothesized that the *B. atratus* queens would use landscape resources differently, changing their foraging behavior (size and shape of the home range) and the preference for certain floral resources according to the pre- and post-nesting condition. To our knowledge, this is the first study of its kind to link spatial habitat selection of bees revealed by radio telemetry with floral pollen resources in a working agroecosystem landscape.

## Materials and Methods.

### Study area.

The study was carried out on large-scale commercial blueberry farms in Yuqueri station, Entre Ríos province, Argentina (31°22'22.4538" S / 58°07'23.7864" W) neighboring the National Institute of Agricultural Technology, Concordia Experimental Station. The agroecosystem is characterized by the presence of blueberry and citrus fields, and small-scale *eucalyptus* and *pine* plantations and windbreaks.

This agro-forestry system is common and expanding in this region of northern Argentina. We conducted our study from the last week of July to the third of September 2015 when the blueberry bushes (*Vaccinium corymbosum* var. Emerald) are in peak bloom.

## **Bee capture and tracking.**

We opportunistically netted 24 *Bombus atratus* queens that were visiting blueberry bushes at the beginning of August and September. Of the total catches, 7 queens were tagged before nesting and 10 after. We then gently immobilized the bees and glued 0.2 g radio transmitter (ATS Series A2412) on their abdomen (Fig 1.A) (S1 Text). The transmitter emits short radio pulses, allowing for real-time tracking on the ground by technicians using ATS receivers and yagi directional antennas (2.5 kHz, Advanced Telemetry Systems, Inc. R410 Reference User Manual - R06-11) (Fig 1.B). We tracked the bumblebees through the agroecosystem daily from 8 am – 6 pm for 1 – 9 days (S1 Table). Once an individual bumblebee was relocated we recorded the GPS location.

This procedure was carried out in two different time periods of the bees' life cycle: 1) during the nest searching location that immediately follows emergence from hibernation when the queens seek suitable a site to rear a colony; and 2) after nest establishment, when the queen has established its nest and is rearing the first cohort of workers. The nest searching period coincided with the beginning of the blueberry crop's flowering (July 28 to August 7). The post-nest establishment period occurred during the end of the blueberry bloom and the beginning of the blooming of most native plants (August 31 to September 22) (Abrahamovich, personal observation). When a nest location was confirmed, we also recorded that location and notes its substrate.

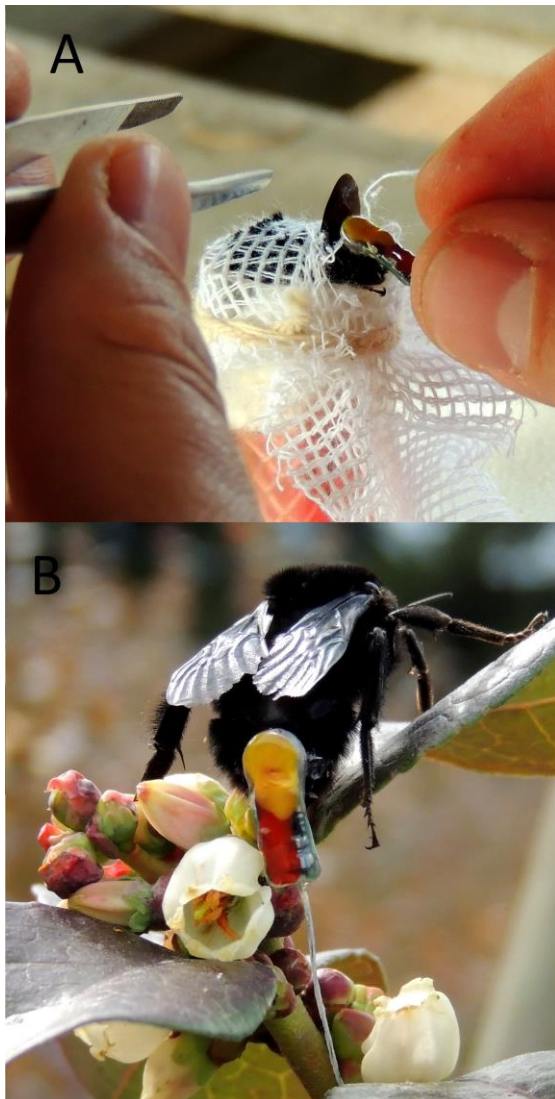

**Fig 1. Fixing of the radius transmitter.** A) Immobilization of the individual to be tracked in a soft rubber tube with a foam plunger; transmitter was attached with fast-acting glue. B) *Bombus atratus* queen with transmitter foraging on blueberry flowers. Photo credits: P. Cavigliasso.

## Land use classification.

We classified the study area vegetation that cover 3,141.5 km<sup>2</sup> using five land uses categories (LUC hereafter). The LUCs were grouped into: 1) *Blueberry*, the area occupied by blueberry field; 2) *Forest plantations*, comprised of planted blocks of *Pinus* and *Eucalyptus* spp. and windbreak of *Casuarina* spp.; 3) *Semi-natural area*, including pastures, abandoned lots, areas in recovery and

131 road margins; 4) *Other fruits*, primarily citrus; and 5) *Developed*, representing human-constructions such  
 132 as houses, barns and roads. The classification was done using the "Google Satellite" option of the  
 133 "OpenLayers plugin" tool of QGIS (version Essen 2.14.3, available at <https://www.qgis.org/es/site/>), with  
 134 a WGS / Pseudo Mercator projection (EPSG: 3857). We then calculated the proportional use of each land  
 135 cover type based on the observed GPS locations, giving each observed point a class (e.g., blueberry or  
 136 semi-natural) and quantifying the relative frequency of occurrence for each bee individual, allowing us to  
 137 compare habitat use before and after nesting. These LUCs were then used in further analysis (described  
 138 below).

## Bee home ranges and habitat selection.

To estimate the home range and habitat selection of the queen bumblebees, we used two methods: Minimum Convex Polygon (MCP) and kernel density (KD). These two methods show complementary information on home range and habitat use, with MCPs representing the furthest ranging territory of the bees and the KD demonstrating which habitats the bees were most likely to use [43-45]. These metrics thus show us where the queens can fly and what LUC they use more intensely and thus prioritize [46].

MCP were calculated from the connected perimeter of the 5 most external recorded GPS locations taken for each individual. This method generates a polygon with an area equivalent to the minimum portion of the landscape used by each individual. From the MCP, we made inferences on the way they move, maximum flight distances, and preferences for any land use present within the landscape (land uses categories, described below). As the maximum flight distance, for each individual we used the most distant two vertices of the MCP [41]. We also characterized the shape of the polygon using two parameters: Coefficient of Compactness (Kc) and Circularity Ratio (Rci). Kc is defined as the relationship between the perimeter of a polygon and the perimeter of an area circumference equivalent to that of the polygon to be evaluated (Formula 1A – S2 Text), and is a continuous variable between 1 and 3; high values indicate very elongated areas and low values indicate more circular areas. Rci is the quotient between the areas of the polygon and that of a circle whose circumference is equivalent to its perimeter (Formula 1.B – S2 Text, range from 0-1 with 1 being totally circular areas for the unit value, square for the value 0.785 and irregular and elongated for values lower than 0.20). This coefficient is used in a complementary way for the interpretation of Kc since they describe similar parameters. These geometric parameters are widely used to classify the two-dimensional areas on maps [47-49]. These indices, although not previously used to characterize movement in animals, can be easily calculated and provide an accurate approximation of the non-uniform two-dimensional movement areas.



We calculated the KDs for *B. atratus* queens for both time periods. For this, we used the "Heatmap plugin" tool of QGIS, to create a raster layer through the density of points observed in each stage studied. For this calculation, we use the kernel function "*Quartic (triponderated)*" that resembles a circular kernel with a fixed radius to 60 layer units, which defines the direct distance from the estimated point and specifies the influence of the kernel [50]. It has been shown that this procedure is suitable for this purpose [51]. The estimators of the Kernel functions calculated for both stages are presented in S2 Table.

## **Use of the floral resource around the agroecosystem.**

To evaluate changes in the use of floral resources before and after nest establishment, we collected queen bees each week to analyze pollen loads on their bodies, and we collected pollen from all available flowering plants in the landscape to make a pollen reference library. *B. atratus* bees were captured using an entomological vacuum while walking a random transect for 10 min in the same fields where we tracked the bees. Collected bumblebees were stored individually in Falcon tubes with 10 ml of 70% alcohol. We then collected the pollen that was adhered to bumblebee bodies by gently agitating the tube, resulting in a homogenized solution of pollen. From this solution, we extracted 10 µl, stained the pollen with Alexander's stain, and used a Neubauer's chamber to count the relative abundance and identity of the first 100 pollen grains observed under an optical microscope (Boeco BM-300/I/SP). Pollen found on the bumblebees was compared in three time periods following blueberry flowering and the date of capture: Early flower (4<sup>th</sup> week of July and 1<sup>st</sup> week of August); Peak flowering (2<sup>nd</sup> and 3<sup>rd</sup> weeks of August); and Post-peak (4<sup>th</sup> week of August to 2<sup>nd</sup> of September). The pollen library floral specimens were collected from blooming plants in the study area. Pollen samples were dried in an oven for 4 hours at 65 ° C to and we took a microphotograph of each pollen species (adaptation from Gui et al. 2014 [52]).



## Data Analysis.

First, we compared foraging metrics within the condition (before and after) of nest establishment. We considered as responses variable the MCP area, maximum flight distances and shape parameters (Kc and Rci) and used a Kruskal-Wallis test.

The relative frequency of waypoints observed in each LUC during the pre- and post-nest life stages we compared through generalized linear mixed models (GLMM). For this analysis, the number of waypoints present in each LUC within the Minimum Convex Polygon (MCP) was a response variable (negative binomial distribution) and the stage (before and after establishing a nest) was a fixed effect. The analyzes were done with the statistical software R 3.5.1 (R Development Core Team, 2013). We used the *glmer* and *glmer.nb* function of the "lme4" package version 1.1-12 for the GLMM.

Finally, the number of plant species and the proportion of the pollen species best represented as indicated by pollen on bees (response variable) on every *B. atratus* queen for the three blueberry flowering time stage was compared to explore how bumblebee queens use floral resources over time. Because of the non-normal nature of these data, we completed the pollen analysis using Kruskal-Wallis test.

## Results.

In total, during both study periods, we captured and tracked 24 bumblebee queens. We recorded 458 waypoints, of which 152 were obtained before bees establishing the nest and 306 were post-establishment. From bumblebees observed at the beginning of the bloom,  $23 \pm 11$  location were recorded. In contrast with those the end of bloom that added  $33 \pm 20$  location per queen. Seventeen bumblebees were regularly relocated (more than 5 GPS locations) and only these individuals were used for data analysis, per the criteria of the MCP and KD method.

## Foraging metrics.

*Bombus atratus* changed their foraging behavior before and after nest establishment. Before selecting a nest, queens foraged over larger areas based upon MCPs (84% larger before vs. after.  $H = 6.94$ ,  $p = 0.0068$ ) (Table 1), with a tendency to forage within an oval shape ( $H = 1.87$ ,  $p = 0.0702$ ), whereas after setting a nest bumblebees queens foraged in smaller and more elongated areas. The average maximum flight distance was  $642.58 \pm 396.89$  m, not finding significant differences between stages ( $H = 2.44$ ,  $p = 0.1331$ ) (Fig 2).

**Table 1. Parameters of size and form of MCP in both stages of the home ranges of radio tracked *B. atratus* queens.**

| Establishment Nest          | Before                 | After                  |
|-----------------------------|------------------------|------------------------|
| MCP-Area (ha) *             | 22.7 ( $\pm$ 31.69)    | 3.56 ( $\pm$ 4.20)     |
| MCP-Kc <sup>a</sup>         | 1.35 ( $\pm$ 0.18)     | 1.99 ( $\pm$ 1.08)     |
| MCP-Rci <sup>b</sup>        | 0.56 ( $\pm$ 0.13)     | 0.37 ( $\pm$ 0.21)     |
| Maximum flight distance (m) | 813.82 ( $\pm$ 421.77) | 522.71 ( $\pm$ 350.25) |

Comparison by non-parametric variance analysis Kruskal-Wallis. Mean values ( $\pm$  Standard Deviation). “\*” parameters show significant differences ( $p = <0.05$ ).

<sup>a</sup> Coefficient of Compactness

<sup>b</sup> Circularity Ratio

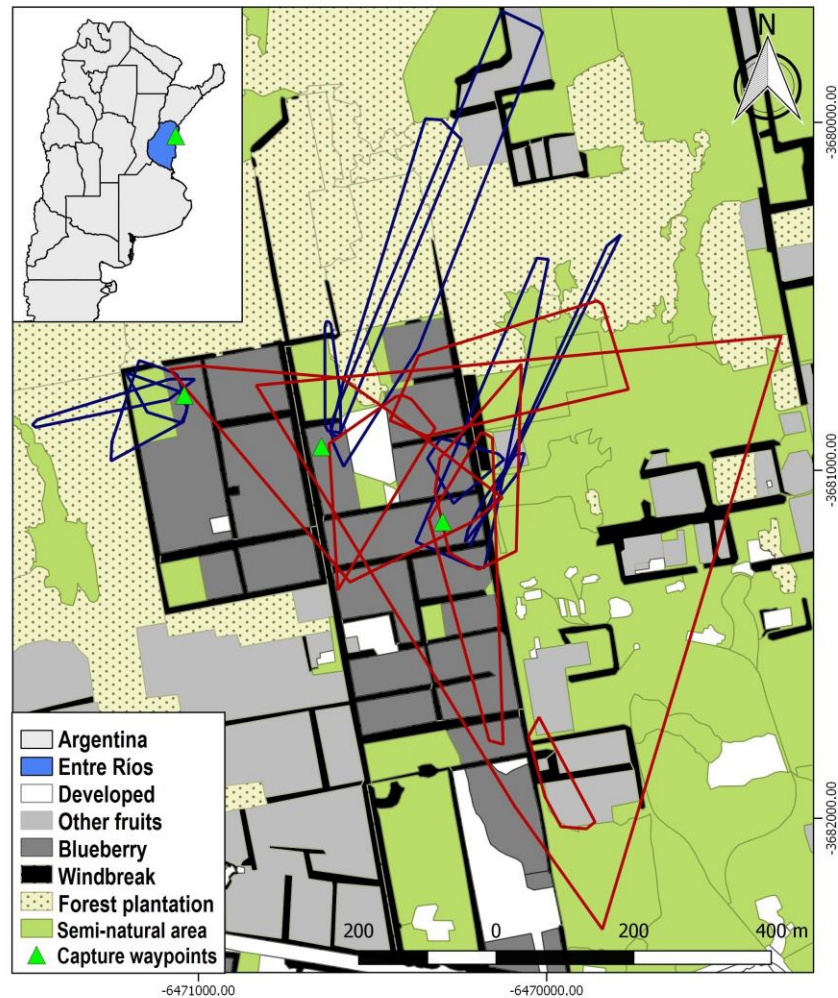

**Fig 2. Location of the MCPs observed in both monitoring stages.** Foraging areas of the queens of *B. atratus* are highlighted before (red) and after (blue) the establishment of the nests.

## Use of the landscape and floral resource around the agroecosystem.

Before selecting a nest, queen bees focused on blueberry fields that were just beginning to flower. After nest establishment, queens tended to forage in the periphery of the blueberry, often near *semi-natural* habitats and *other fruit* LUC with blooming wild and domesticated plants (i.e., citrus plantations) (Fig 3). After nest establishment, queen bumblebees' home ranges appear to shrink.

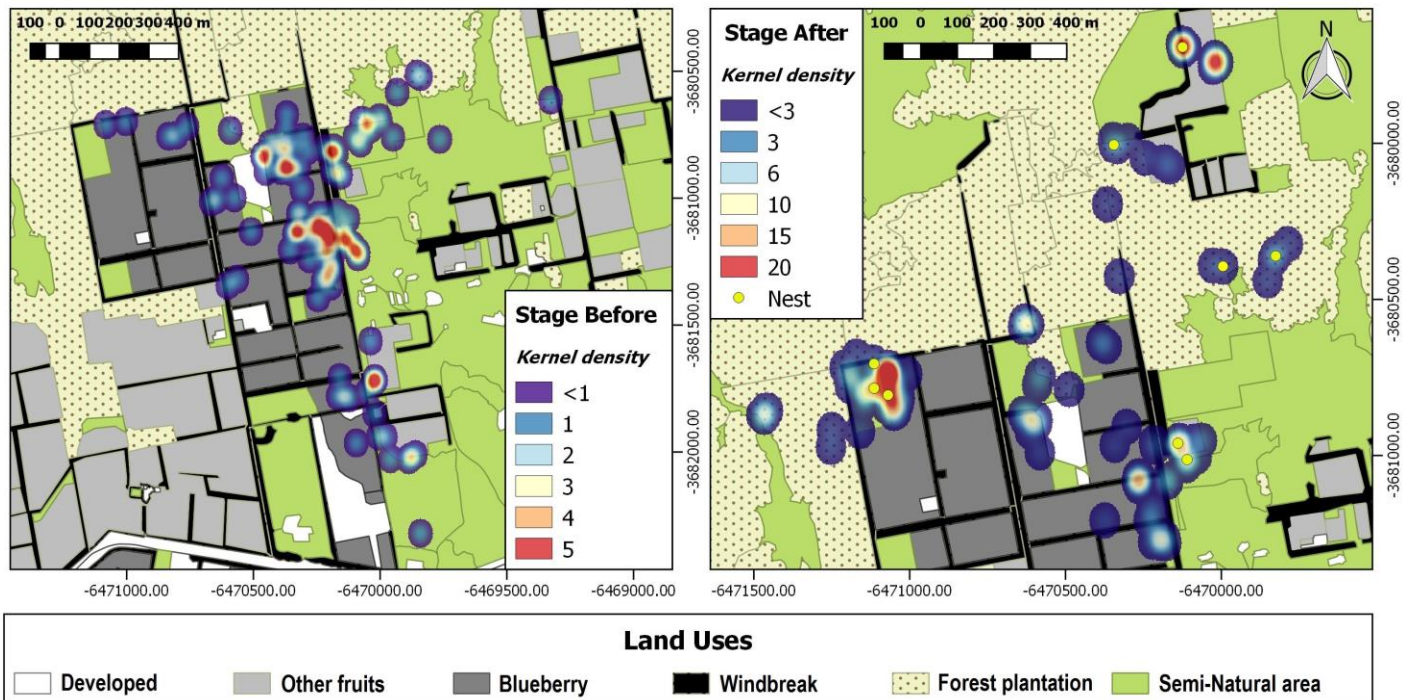

**Fig 3. - Kernel density maps of tracking bumblebees' queens before and after setting a nest.** Red values (warm colors) indicate high probability presence while Cool colors (Blue) tend to low probability values

The proportional use of different habitats differed in accordance with setting a nest. For instance, they increased their foraging in forested areas once they established a nest (GLMM. Negative Binomial.  $F = 6.11, p = 0.0259$ ). Bees increased by nearly 66% their use of forest plantations ( $11.86 \pm 4.00\%$ ) once they have a nest (Fig 4). It should be noted that 56% of the nests observed were located on the edge ( $\sim 3-5$  m) of *Eucalyptus grandis* plantation or forest windbreaks of *Casuarina sp.*, both of which are part of the plantation LUC (S3 Table).

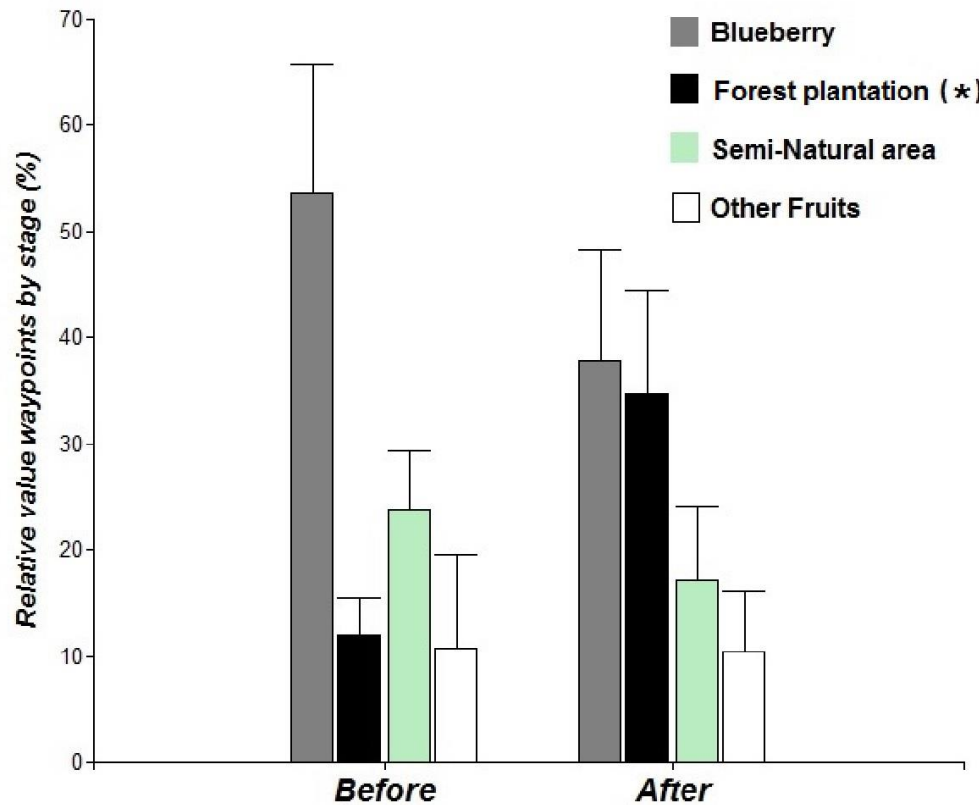

**Fig 4. Comparison of the different LUC through GLMM. Reference with (\*) =  $P < 0.05$ .**

The pollen present on *B. atratus* queens ( $n = 44$ ) captured inside the blueberry fields during the whole flowering of the var. Emerald, was from 66 plant species and did differ marginally across time of the blueberry flowering ( $H = 5.06$ ,  $p = 0.076$ ). During the peak of flowering of blueberry fields, the bumblebees focus their foraging on this mass flowering resource, but by the end of the blueberry flowering, other floral species increase their importance as resources for them. Plant species *Conium maculatum* L., *Buddleja stachyoides* Cham. & Schltdl. and *Nothoscordum arenarium* become more important and are collected more by queens of *B. atratus* in the post-peak period. These analyzes also show an increase in the botanical diversity of pollen present on *B. atratus* of ~ 30% more species between the peak of flowering and the post-peak (Table 2) (S4 Table).



**Table 2. Pollen diversity and proportion of the pollen content of the most represented species on *B. atratus* at each time of flowering.**

| <i>n</i> <sup>a</sup>          | Stage          |                |                | Kruskal-Wallis test |           |
|--------------------------------|----------------|----------------|----------------|---------------------|-----------|
|                                | Early flower   | Peak flowering | Post-peak      | <i>H</i>            | <i>p</i>  |
|                                | 19             | 12             | 13             |                     |           |
| N° Pollen spp. <sup>b</sup>    | 11.00 (± 4.89) | 7.40 (± 8.40)  | 14.13 (± 6.32) | 5.06                | <i>ns</i> |
| <i>Vaccinium corymbosum</i>    | 767            | 742            | 69             | 14,67               | 0,0006    |
| <i>Justicia sp.</i>            | 67             | 49             | 45             | 0,08                | <i>ns</i> |
| <i>Solanum diflorum</i>        | 88             | 73             | 28             | 1,26                | <i>ns</i> |
| <i>Nothoscordum arenarium</i>  | 92             | 32             | 106            | 6,73                | 0,0298    |
| <i>Echium plantagineum</i>     | 65             | 36             | 131            | 1,93                | <i>ns</i> |
| <i>Solanum sisymbriifolium</i> | 27             | 24             | 56             | 2,47                | <i>ns</i> |
| <i>Conium maculatum</i>        | 4              | 1              | 224            | 8,18                | 0,0008    |
| <i>Cuphea glutinosa</i>        | 202            | 91             | 17             | 0,86                | <i>ns</i> |
| <i>Buddleia stachyoides</i>    | 82             | 3              | 165            | 5,32                | 0,02      |
| <i>Others</i>                  | 506            | 150            | 459            | 10,95               | 0,0041    |

<sup>a</sup> Number of *B. atratus* individuals analyzed. Mean (± standard deviation)

<sup>b</sup> Number of floral species represented in the palynological characterization on *B. atratus* queens.

Degree of significance. *ns*: not significant; *p*: < 0.05 significant.

## Discussion.

We investigated bumblebee habitat selection, flight distance, and home range to better understand how *B. atratus* selects floral resources in a complex and intensively used agricultural landscape. In real-time, we observed variation in the size and shape of their forage areas, flight distances, and habitat preferences related to food and nesting. Queen *B. atratus* appear to decrease their foraging areas and flight distances once they establish nests, using mostly the edges of the forest plantations to establish their colonies. During this stage, they prefer land uses with greater floral diversity to supply their growing

worker colony (e.g. *Semi-Natural*). Overall, our results show the importance of a diversified habitat within agricultural areas to help sustain bumblebee's colonies that provide pollination service to both blueberry and native plants within this region.

These results suggest two different patterns of movement for queen bumblebees during different periods in their life cycle. During the pre-nesting period, queen bumblebees flew within relatively large and circular-oval home ranges. During this life stage, queen bees often conduct reconnaissance flights of the environment in search of suitable nesting sites [27-53]. This period coincided with the beginning of the blueberry flowering, and this massive bloom likely serves as an important source of energetic resources that sustains what are likely energetically expensive nest-searching flights. Relative to some bees, bumblebees have only a modest ability to excavate a nest cavity [33]. For this reason, features correlated with variation in soil density and accumulation of leaf litter such as hedgerows, fence lines and forest edges have been found to have higher densities of bumblebee nests compared to such features as closed woods or grassland [54]. Here, we found that queens selected nest sites in habitats with a greater amount of leaf litter accumulated on the soil (i.e. windbreak and edges of plantations of *Eucalyptus* sp. and *Pinus* sp.), selecting sites adjacent to land uses with a diversity of suitable food sources and within their range of flight [55]

After *B. atratus* queens had established their nests, they changed their flight patterns and the Minimum Convex Polygons grew to be more elongated areas. In this later period, the flight behavior was more likely to be oriented with the predominant winds of spring (NW and SW), and in our landscapes this period coincides with the end of the blueberry bloom and the beginning of the other flowering plants. In these cases, the foraging sites were against the direction of the wind, suggesting that the bees had established sources of pollen resources. This behavior has been documented for individual bees who know their environment and have standardized routes of foraging (i.e. "bee line") [56-57]. At this later stage,



the queens were likely focused on collecting pollen in mass to feed the growing worker bee population that would soon emerge.

In the same way that the requirements of the species of floral visitors are modified during their life cycle, the supply of nutritional resources that the environment provides generally changes, forcing to have an adaptive behavior by of species that collect their food from renewable resources [58]. This study is a snapshot in time of how *B. atratus* queens modified their interactions with the habitat before and after the formation of nest. During the nest searching period the queens intensely used the blueberry fields since the flowers provide rich and abundant nectar and pollen. Following nest establishment, queens care for their emerging worker bees and are reducing their movements [33]. At this stage of their life cycle, the nutritional requirements for the queen and the colony change. The future worker bees require protein-rich food for its development [59]. Consequently, the bees' movements shifted to include the land use categories with greater pollen heterogeneity [60-61] despite continued, albeit reduced, availability of blueberry flowers.

*Bombus atratus* movements are similar to those reported for other bumblebees from Europe (S5 Table). Few studies have studied the flight behavior in *Bombus* queens, finding results similar to those obtained by Walther-Hellwig & Frankl (2000) [62] by the capture-recapture method for *B. terrestris* and ~ 50% less than those observed by Hagen et al. (2011) [41] using telemetry technology in queens of *B. hortorum*. Likewise, more studies of movements in this bumblebee caste are lacking to be able to specify a flight pattern and generalized foraging behavior for these stages of its life cycle.

The results obtained from the queens of *B. atratus* around the blueberry agroecosystem demonstrate how they change the size and shape of their home ranges, but also the use of land use categories as their dietary needs change. Although the relative presence of bumblebees in land use groups in general does not show significant differences, after the establishment of a nest, forest plantations emerge as an

important habitat feature, increasing their use by more than 65% and housing 56% of nests observed. This observation suggests that these small-scale plantations can represent a valuable resource for this species providing shelter and possible nutrients [63-64]. The plantations may also serve as guides in foraging flights since bumblebees are more likely to perform straight flights when flying along windbreak compared to when they are flying in open fields, suggesting that they may follow linear landscape features [65]. In addition, these actors are actively pollinating within the fields at a time when there are not many other species of native pollinators, giving them an intrinsic value in this agroecosystem

The analysis of body pollen reinforces our telemetry experiment, showing that between the periods of blueberry bloom there was a variation in the pollen proportion of floral species collected from the bumblebees. In the post-peak blueberry period there was an increase of 30+ % in the diversity of pollinic morphotypes present on the bumblebees. This result suggests that they looked for food in the other land use categories to meet the changing nutritional needs of the workers. It should be noted that, the Emerald variety of blueberry planted in the fields is the first to bloom in the region and conventional blueberry production systems may combine batches of different varieties with subsequent or sequential flowering curves. This observation supports our hypothesis that the *B. atratus* queens change how they use the available landscapes based upon the resource availability and perform a cost-benefit evaluation according to the nutritional needs required by the stage of their life cycle [66-70]. This is likely one of the most sensitive stages of the bumblebee's life cycle, aggravated when there is a shortage of resources for foraging, which could cause the death of the young queen and her colony [34]. In this context, the massive bloom of blueberry fields emerges as an important source of nectar and pollen in this period, supporting the establishment of new colonies.

## Final considerations.

This is among the first studies to link flight behavior with floral and nesting resources in a productive mosaic agroecosystem, and demonstrates how the resource needs of bumblebee queens' changes over time and relies on semi-natural areas surrounding agricultural fields as foraging habitat. Heterogeneous landscapes can provide diverse resources that are needed by *B. atratus* queens at different moments of their life cycle. Blueberry fields appear to be an important resource at the beginning of their life cycle until the moment of nesting. At the same time, the edges of forest plantations seem to offer nesting habitat for native bees when they are adjacent to pollen-rich fields, and the semi-natural areas are harnessed for the workers' protein-rich diet. We emphasize that we did not directly observe the bees using the bare soil or the land uses developed during our study.

Bees provide vital ecosystem services as pollinators and we need to work to sustain these wild pollinators. The management and conservation of these semi-natural land use categories is an important part of achieving sustainability of agro-ecological systems because they help supplement bee nutritional needs with diverse pollen sources [71] and nesting sites. Semi-natural habitats provide essential resources for the formation and survival of the worker caste that, when upon emerging, will take the lead in supplying the colony with pollen, and thus providing for the next season's queens [72]. Our work contributes to the growing understanding of how bumblebees use the environment, and provides valuable information for conservation planning and sustainable management of the land at a crucial moment in its life cycle. We suggest that land owners and managers of agricultural lands should consider the full life cycle of bees from nest formation to the worker bee emergence, and this longer-term perspective can help maintain native bees in farmlands from year after year, maximizing the pollination service they provide.

## AUTHORS CONTRIBUTIONS.

P.C., C.C.P., E.A. and J.L. conceived the ideas and jointly designed the telemetry methodology while P.C. designed the pollen analysis portion of the project; P. C., C. C. P. and N. P.C. contributed equally to the writing of the manuscript; P. C., E. A. and C. C. P. collected the samples; P. C. analyzed the data. This work was supported by the National Science Foundation Partnerships in International Research and Education grant (No. 1243444) to D.F. All authors contributed critically to the drafts and gave final approval for publication.

## Acknowledgments.

This research was supported by the US National Science Foundation Partnerships in International Research and Education research grant num. 1243444. We thank Fernanda Rivadeneira and all the members of the Fruit and Forestry Area of the Experimental Station Concordia for helping with field logistics and for connecting us with area landowners, and for the use of equipment and vehicles. Lastly, we thank Nicolas O. Monzon, for the assistance and good predisposition in the collection of wild flora and identification of the different floral species pollen.

## References.

- 1) Ollerton J, Winfree R & Tarrant S. How many flowering plants are pollinated by animals? *Oikos*. 2011; 120(3): 321-326. <https://doi.org/10.1111/j.1600-0706.2010.18644.x>
- 2) Oliver TH, Isaac NJB, August TA, Woodcock BA, Roy DR & Bullock JM. Declining resilience of ecosystem functions under biodiversity loss. *Nature*. 2015; 6: 10122. <https://doi.org/10.1038/ncomms10122>
- 3) Winfree R, Gross BJ & Kremen C. Valuing pollination services to agriculture. *Ecol. Econ*. 2011; 71: 80–88. <https://doi.org/10.1016/j.ecolecon.2011.08.001>
- 4) Chaplin-Kramer R, Dornbeck E, Gerber J, Knuth KA, Mueller ND, Mueller M. ... & Klein AM. Global malnutrition overlaps with pollinator-dependent micronutrient production. *Proc. R. Soc. B*. 2014; 281(1794): 20141799. <https://doi.org/10.1098/rspb.2014.1799>
- 5) Palomo I, Felipe-Lucia MR, Bennett EM, Martín-López B & Pascual U. Disentangling the pathways and effects of ecosystem service co-production. *Adv. Ecol. Res*. 2016; 54: 245-283. Academic Press. <https://doi.org/10.1016/bs.aecr.2015.09.003>
- 6) Klein AM, Vaissiere BE, Cane JH, Steffan-Dewenter I, Cunningham SA, Kremen C & Tscharntke T. Importance of pollinators in changing landscapes for world crops. *Proceedings of the Royal Society of London B: Biological Sciences*. 2007; 274(1608): 303-313. <https://doi.org/10.1098/rspb.2006.3721>
- 7) Bartomeus I, Potts SG, Steffan-Dewenter I, Vaissiere BE, Wojciechowski M, Kremenka KM. Contribution of insect pollinators to crop yield and quality varies with agricultural intensification. *PeerJ*, 2014; 2, e328. <https://doi.org/10.7717/peerj.328>

- 8) Kremen C, Williams NM & Thorp RW. Crop pollination from native bees at risk from agricultural intensification. *Proc. Natl Acad. Sci.* 2002; 99(26): 16812-16816.  
<https://doi.org/10.1073/pnas.262413599>
- 9) Ricketts TH, Regetz J, Steffan-Dewenter I, Cunningham SA, Kremen C, Bogdanski A, ... & Morandin LA. Landscape effects on crop pollination services: are there general patterns?. *Ecology letters.* 2008; 11(5): 499-515. <https://doi.org/10.1111/j.1461-0248.2008.01157.x>
- 10) Brown MJF & Paxton RJ. The conservation of bees: a global perspective. *Apidologie.* 2009; 40: 410–416. <https://doi.org/10.1051/apido/2009019>
- 11) Garibaldi LA, Steffan-Dewenter I, Winfree R, Aizen MA, Bommarco R, Cunningham SA, ... & Bartomeus I. Wild pollinators enhance fruit set of crops regardless of honey bee abundance. *Science.* 2013; 339(6127): 1608-1611.  
<https://doi.org/10.1126/science.1230200>
- 12) Cariveau DP & Winfree R. Causes of variation in wild bee responses to anthropogenic drivers. *Current Opinion in Insect Science.* 2015; 10: 104–109  
<https://doi.org/10.1016/j.cois.2015.05.004>
- 13) Martins KT, Gonzalez A & Lechowicz MJ. Pollination services are mediated by bee functional diversity and landscape context. *Agriculture, Ecosystems & Environment.* 2015; 200: 12-20. <https://doi.org/10.1016/j.agee.2014.10.018>
- 14) Potts SG, Imperatriz-Fonseca V, Ngo HT, Biesmeijer JC, Breeze TD, Dicks LV, ... & Vanbergen AJ. The assessment report on pollinators, pollination and food production: summary for policymakers. Bonn, Germany, Secretariat of the Intergovernmental

Science-Policy Platform on Biodiversity and Ecosystem Services. 2016; 36pp. [ISBN: 9789280735680](https://doi.org/10.1101/612564)

15) Traveset A, Castro-Urgal R, Rotllàn-Puig X & Lázaro A. Effects of habitat loss on the plant–flower visitor network structure of a dune community. *Oikos*. 2018; 127(1): 45-55. <https://doi.org/10.1111/oik.04154>

16) Mogren CL, Rand TA, Fausti SW & Lundgren JG. (2016). The effects of crop intensification on the diversity of native pollinator communities. *Environmental entomology*. 2016; 45(4): 865-872. <https://doi.org/10.1093/ee/nvw066>

17) Brosi BJ, Daily GC, Shih TM, Oviedo F & Durán G. The effects of forest fragmentation on bee communities in tropical countryside. *Journal of Applied Ecology*. 2008; 45(3): 773-783. <https://doi.org/10.1111/j.1365-2664.2007.01412.x>

18) Kennedy CM, Lonsdorf E, Neel MC, Williams NM, Ricketts TH, Winfree R, ... & Carvalheiro LG. A global quantitative synthesis of local and landscape effects on wild bee pollinators in agroecosystems. *Ecology letters*. 2013; 16(5): 584-599. <https://doi.org/10.1111/ele.12082>

19) Gill RJ, Baldock KC, Brown MJ, Cresswell JE, Dicks LV, Fountain MT, ... & Ollerton J. Protecting an ecosystem service: approaches to understanding and mitigating threats to wild insect pollinators. In *Advances in Ecological Research*. 2016; 54:135-206. Academic Press. <https://doi.org/10.1016/bs.aecr.2015.10.007>

20) Campbell AJ, Carvalheiro LG, Maués MM, Jaffé R, Giannini TC, Freitas MAB, ... & Menezes C. Anthropogenic disturbance of tropical forests threatens pollination services to açai palm in the Amazon river delta. *Journal of Applied Ecology*. 2018; 55(4): 1725-1736. <https://doi.org/10.1111/1365-2664.13086>



- 21) Corbet SA, Williams IH & Osborne JL. Bees and the pollination of crops and wild flowers in the European Community. *Bee world*. 1991; 72(2): 47-59.  
<https://doi.org/10.1080/0005772X.1991.11099079>
- 22) Carvell C, Roy DB, Smart SM, Pywell RF, Preston CD & Goulson D. Declines in forage availability for bumblebees at a national scale. *Biological conservation*. 2006; 132(4): 481-489. <https://doi.org/10.1016/j.biocon.2006.05.008>
- 23) Cameron SA, Lozier JD, Strange JP, Koch JB, Cordes N, Solter LF & Griswold TL. Patterns of widespread decline in North American bumble bees. *Proceedings of the National Academy of Sciences*. 2011; 108(2): 662-667. <https://doi.org/10.1073/pnas.1014743108>
- 24) Figueroa LL, & Bergey EA. Bumble bees (Hymenoptera: Apidae) of Oklahoma: past and present biodiversity. *Journal of the Kansas Entomological Society*. 2015; 88(4): 418-429.  
<https://doi.org/10.2317/0022-8567-88.4.418>
- 25) Sánchez-Bayo F & Wyckhuys KA. Worldwide decline of the entomofauna: A review of its drivers. *Biological Conservation*. 2019; 232: 8-27.  
<https://doi.org/10.1016/j.biocon.2019.01.020>
- 26) Abrahamovich AH & Díaz NB. Distribución geográfica de las especies del género *Bombus* Latreille (Hymenoptera, Apidae) en Argentina. *Rev Bras Entomol*. 2001; 45: 23-36.
- 27) Goulson D, Lepais O, O'connor S, Osborne JL, Sanderson RA, Cussans J, ... & Darvill B. Effects of land use at a landscape scale on bumblebee nest density and survival. *J. Appl. Ecol*. 2010; 47: 1207–1215. <https://doi.org/10.1111/j.1365-2664.2010.01872.x>

- 28) Willmer PG, Bataw AAM & Hughes JP. The superiority of bumblebees to honeybees as pollinators: insect visits to raspberry flowers. *Ecological Entomology*. 1994; 19(3): 271-284. <https://doi.org/10.1111/j.1365-2311.1994.tb00419.x>
- 29) Desjardins ÈC & De Oliveira D. Commercial bumble bee *Bombus impatiens* (Hymenoptera: Apidae) as a pollinator in lowbush blueberry (Ericale: Ericaceae) fields. *Journal of Economic Entomology*. 2006; 99(2): 443-449. <https://doi.org/10.1093/jee/99.2.443>
- 30) Rao S, Stephen WP & White L. Native bee pollinator diversity in Oregon blueberries. In IX International Vaccinium Symposium. 2008; 810, pp. 539-548. <https://doi.org/10.17660/ActaHortic.2009.810.71>
- 31) Stephen WP, Rao S & White L. Abundance, diversity and foraging contribution of bumble bees to blueberry production in western Oregon. In IX International Vaccinium Symposium. 2008; 810: 557-562. <https://doi.org/10.17660/ActaHortic.2009.810.73>
- 32) Tuell JK, Fiedler AK, Landis D & Isaacs R. Visitation by wild and managed bees (Hymenoptera: Apoidea) to eastern US native plants for use in conservation programs. *Environmental Entomology*. 2008; 37(3): 707-718. [https://doi.org/10.1603/0046-225X\(2008\)37\[707:VBWAMB\]2.0.CO;2](https://doi.org/10.1603/0046-225X(2008)37[707:VBWAMB]2.0.CO;2)
- 33) De Luca PA & Vallejo-Marín M. What's the 'buzz' about? The ecology and evolutionary significance of buzz-pollination. *Current opinion in plant biology*. 2013; 16(4): 429-435. <https://doi.org/10.1016/j.pbi.2013.05.002>
- 34) Goulson D. *Bumblebees: behaviour, ecology, and conservation*. Oxford University Press on Demand. 2010.
- 35) Free JB & Butler CG. *Bumblebee*. London: Collins. 1959.

- 36) Heinrich B. Bumblebee Economics. Cambridge, MA: Harvard University Press. 1979.
- 37) Herascu R. Bumblebee navigation and foraging behaviour: a short review. Field Studies. 2017. [https://fsj.field-studies-council.org/media/3260062/fs2017\\_herascu.pdf](https://fsj.field-studies-council.org/media/3260062/fs2017_herascu.pdf)
- 38) Orbán LL & Plowright CMS. Getting to the Start Line: How Bumblebees and Honeybees are Visually Guided Towards their First Floral Contact. Insectes Sociaux. 2014; 61: 325-336. <https://doi.org/10.1007/s00040-014-0366-2>
- 39) Greenleaf SS, Williams NM, Winfree R & Kremen C. Bee foraging ranges and their relationship to body size. Oecologia. 2007; 153: 589–596. <https://doi.org/10.1007/s00442-007-0752-9>
- 40) Wikelski M, Moxley J, Eaton-Mordas A, Lopez-Urbe MM, Holland R, Moskowitz D, ... & Kays R. Large-range movements of neotropical orchid bees observed via radio telemetry. PLoS one. 2010; 5(5): e10738. <https://doi.org/10.1371/journal.pone.0010738>
- 41) Hagen M, Wikelski M & Kissling WD. Space use of Bumblebees (Bombus spp.) revealed by Radio-Tracking. PLoS ONE. 2011; 6(5): e19997. <https://doi.org/10.1371/journal.pone.0019997>
- 42) Carvell C, Bourke AFG, Osborne JL & Heard MS. Effects of an agri-environment scheme on bumblebee reproduction at local and landscape scales. Basic and Applied Ecology. 2015; 16: 519-530. <https://doi.org/10.1016/j.baae.2015.05.006>
- 43) Worton BJ. Kernel methods for estimating the utilization distribution in home-range studies. Ecology. 1989; 70(1): 164-168. <https://doi.org/10.2307/1938423>
- 44) Sheather SJ. Density estimation. Statistical science. 2004; 588-597. <https://www.jstor.org/stable/4144429>

- 45) Silverman BW. Density estimation for statistics and data analysis. 1986. London: Chapman & Hall. <http://users.stat.ufl.edu/~rrandles/sta6934/smhandout.pdf>
- 46) Stirzaker D. Elementary probability. Cambridge University Press. 2003. [ISBN-10 0-521-53428-3](#) (paperback)
- 47) Clarke JI. Morphometry from maps. Essays in geomorphology. 1966; 252: 235-274.
- 48) Silva MT, da Silva VDP, de Souza EP & de Oliveira VG. Morphometric analysis of the basin low middle São Francisco River. Journal of Hyperspectral Remote Sensing; 2014. 4(8): 168-174. <https://doi.org/10.29150/jhrs.v4i8.22714>
- 49) Farias P & de Araújo MDS. Spatial analysis on the watershed of Goiana River–PE: comparison with the use of geoprocessing and ANA data. Journal of Hyperspectral Remote Sensing. 2017; 7(3): 111-124. [ISSN:2237-2202](#)
- 50) Salgado-Ugarte IH. Suavización no paramétrica para análisis de datos. FES Zaragoza-DGAPA UNAM (PAPIIT IN217596, PAPIME 192031). 2002. [ISBN: 970-32-0292-6](#)
- 51) Morales JM & Carlo TA. The effects of plant distribution and frugivore density on the scale and shape of dispersal kernels. Ecology. 2006; 87(6): 1489-1496. [https://doi.org/10.1890/0012-9658\(2006\)87\[1489:TEOPDA\]2.0.CO;2](https://doi.org/10.1890/0012-9658(2006)87[1489:TEOPDA]2.0.CO;2)
- 52) Gui HP, Tan QL, Hu CX, Zhang Y, Zheng CS, Sun XC & Zhao X. Floral analysis for Satsuma mandarin (Citrus unshiu Marc.) nutrient diagnosis based on the relationship between flowers and leaves. Scientia Horticulturae. 2014; 169: 51-56. <https://doi.org/10.1016/j.scienta.2014.02.014>
- 53) Menzel R & Greggers U. The memory structure of navigation in honeybees. Journal of Comparative Physiology A. 2015; 201(6): 547-561. <https://doi.org/10.1007/s00359-015-0987-6>

- 54) Osborne JL, Martin AP, Shortall CR, Todd AD, Goulson D, Knight ME, Hale RJ & Sanderson RA. Quantifying and Comparing Bumblebee Nest Densities in Gardens and Countryside Habitats. *Journal of Applied Ecology*. 2008; 45: 784-792. <https://doi.org/10.1111/j.1365-2664.2007.01359.x>
- 55) Geib JC, Strange JP & Galen C. Bumble bee nest abundance, foraging distance, and host-plant reproduction: implications for management and conservation. *Ecological Applications*. 2015; 25(3): 768-778. <https://doi.org/10.1890/14-0151.1>
- 56) Osborne JL, Clark SJ, Morris RJ, Williams IH, Riley JR, Smith AD, ... & Edwards AS. A landscape-scale study of bumble bee foraging range and constancy, using harmonic radar. *Journal of Applied Ecology*. 1999; 36(4): 519-533. <https://doi.org/10.1046/j.1365-2664.1999.00428.x>
- 57) Haas CA & Cartar RV. Robust flight performance of bumble bees with artificially induced wing wear. *Canadian Journal of Zoology*. 2008; 86(7): 668-675. <https://doi.org/10.1139/Z08-034>
- 58) Tsujimoto SG & Ishii HS. Effect of flower perceptibility on spatial-reward associative learning by bumble bees. *Behavioral Ecology and Sociobiology*. 2017; 71(7): 105. <https://doi.org/10.1007/s00265-017-2328-y>
- 59) Vaudo AD, Tooker JF, Grozinger CM & Patch HM. Bee nutrition and floral resource restoration. *Current Opinion in Insect Science*. 2015; 10: 133-141. <https://doi.org/10.1016/j.cois.2015.05.008>
- 60) Sardiñas HS & Kremen C. Pollination services from field-scale agricultural diversification may be context-dependent. *Agriculture, Ecosystems & Environment*. 2015; 207: 17-25. <https://doi.org/10.1016/j.agee.2015.03.020>

- 61) Garibaldi LA, Gemmill-Herren B, D'Annolfo R, Graeb BE, Cunningham SA & Breeze TD. Farming approaches for greater biodiversity, livelihoods, and food security. Trends in ecology & evolution. 2017; 32(1): 68-80. <https://doi.org/10.1016/j.tree.2016.10.001>
- 62) Walther-Hellwig K & Frankl R. Foraging habitats and foraging distances of bumblebees, *Bombus* spp. (Hym., Apidae), in an agricultural landscape. Journal of Applied Entomology. 2000; 124(7-8): 299-306. <https://doi.org/10.1046/j.1439-0418.2000.00484.x>
- 63) Abrahamovich AH, Telleria MC & Díaz NB. *Bombus* species and their associated flora in Argentina. Bee World. 2001; 82(2): 76-87. <https://doi.org/10.1080/0005772X.2001.11099505>
- 64) Telleria MC. Palynological analysis of food reserves found in a nest of *Bombus atratus* (Hym. Apidae). Grana. 1998; 37: 2, 125-127. <https://doi.org/10.1080/00173139809362655>
- 65) Cranmer, L, McCollin D & Ollerton J. Landscape structure influences pollinator movements and directly affects plant reproductive success. Oikos. 2012; 121(4): 562-568. <https://doi.org/10.1111/j.1600-0706.2011.19704.x>
- 66) Osborne JL, Martin AP, Carreck NL, Swain JL, Knight ME, Goulson D ... & Sanderson RA. Bumblebee flight distances in relation to the forage landscape. Journal of Animal Ecology. 2008; 77(2): 406-415. <https://doi.org/10.1111/j.1365-2656.2007.01333.x>
- 67) Dicks LV, Baude M, Roberts SP, Phillips J, Green M & Carvell C. How much flower-rich habitat is enough for wild pollinators? Answering a key policy question with incomplete knowledge. Ecological entomology. 2015; 40(S1): 22-35. <https://doi.org/10.1111/een.12226>

- 68) Goulson D, Nicholls E, Botias C & Rotheray EL. Bee declines driven by combined stress from parasites, pesticides, and lack of flowers. *Science*. 2015; 347: 1435. <https://doi.org/10.1126/science.1255957>
- 69) Knight ME, Martin AP, Bishop S, Osborne JL, Hale RJ, Sanderson RA & Goulson D. An interspecific comparison of foraging range and nest density of four bumblebee (*Bombus*) species. *Molecular Ecology*. 2005; 14(6): 1811-1820. <https://doi.org/10.1111/j.1365-294X.2005.02540.x>
- 70) Wolf S & Moritz RF. Foraging distance in *Bombus terrestris* L. (Hymenoptera: Apidae). *Apidologie*. 2008; 39(4): 419-427. <https://doi.org/10.1051/apido:2008020>
- 71) Rao S & Strange JP. Bumble bee (Hymenoptera: Apidae) foraging distance and colony density associated with a late-season mass flowering crop. *Environmental entomology*. 2012; 41(4): 905-915. <https://doi.org/10.1603/EN11316>
- 72) Redhead JW, Dreier S, Bourke AF, Heard MS, Jordan WC, Sumner S, ... & Carvell C. Effects of habitat composition and landscape structure on worker foraging distances of five bumble bee species. *Ecological applications*. 2016; 26(3): 726-739. <https://doi.org/10.1890/15-0546>
- 73) Carvell C, Jordan WC, Bourke AF, Pickles R, Redhead JW & Heard MS. Molecular and spatial analyses reveal links between colony-specific foraging distance and landscape-level resource availability in two bumblebee species. *Oikos*. 2012; 121(5), 734-742. <https://doi.org/10.1111/j.1600-0706.2011.19832.x>
